# Supplementary material for: Li2NbHO2: a new transition-metal oxyhydride with rock-salt-type structure
Source: Royal Society of Chemistry journal article supplement (doi:10.1039/d4cc05503a), 2024-01-01

## checkCIF/PLATON report

Structure factors have been supplied for datablock(s) VESTA\_phase\_1

THIS REPORT IS FOR GUIDANCE ONLY. IF USED AS PART OF A REVIEW PROCEDURE FOR PUBLICATION, IT SHOULD NOT REPLACE THE EXPERTISE OF AN EXPERIENCED CRYSTALLOGRAPHIC REFEREE.

No syntax errors found.      CIF dictionary      Interpreting this report

### Datablock: VESTA\_phase\_1

---

Bond precision:      = 0.0000 A      Wavelength=0.71073

Cell:                      a=4.21998 (16)      b=4.21998 (16)      c=4.21998 (16)  
                                    alpha=90      beta=90      gamma=90

Temperature:      0 K

|                        | Calculated                                  | Reported |
|------------------------|---------------------------------------------|----------|
| Volume                 | 75.150                                      | 75       |
| Space group            | F m -3 m                                    | F m -3 m |
| Hall group             | -F 4 2 3                                    | ?        |
| Moiety formula         | 0.889(O), 0.523(Nb),<br>0.811(Li), 0.444(D) | ?        |
| Sum formula            | D0.44 Li0.81 Nb0.52 O0.89                   | ?        |
| Mr                     | 69.29                                       | 0.00     |
| Dx, g cm <sup>-3</sup> | 4.593                                       | 0.000    |
| Z                      | 3                                           | 0        |
| Mu (mm <sup>-1</sup> ) | 5.818                                       | 0.000    |
| F000                   | 94.2                                        | 0.0      |
| F000'                  | 90.95                                       |          |
| h, k, lmax             |                                             |          |
| Nref                   |                                             |          |
| Tmin, Tmax             |                                             |          |
| Tmin'                  |                                             |          |

Correction method= Not given

Data completeness=      Theta (max) =

R(reflections)=      wR2(reflections)=  
S =      Npar=

---

The following ALERTS were generated. Each ALERT has the format  
**test-name\_ALERT\_alert-type\_alert-level.**  
Click on the hyperlinks for more details of the test.

---

 **Alert level A**

SYMM001\_ALERT\_1\_A \_symmetry\_cell\_setting is missing  
The cell setting should be one of the following  
\* triclinic  
\* monoclinic  
\* orthorhombic  
\* tetragonal  
\* rhombohedral  
\* trigonal  
\* hexagonal  
\* cubic  
The following tests will not be performed.  
SYMMS\_01, SYMMS\_02

EXPT005\_ALERT\_1\_A \_exptl\_crystal\_description is missing  
Crystal habit description.  
The following tests will not be performed.  
CRYSR\_01

DIFF003\_ALERT\_1\_A \_diffrn\_measurement\_device\_type is missing  
Diffractometer make and type. Replaces \_diffrn\_measurement\_type.

GEOM001\_ALERT\_1\_A \_geom\_bond\_atom\_site\_label\_1 is missing  
Label identifying the atom site 1.

GEOM002\_ALERT\_1\_A \_geom\_bond\_atom\_site\_label\_2 is missing  
Label identifying the atom site 2.

GEOM003\_ALERT\_1\_A \_geom\_bond\_distance is missing  
Distance between atom sites 1 and 2.

GEOM006\_ALERT\_1\_A \_geom\_angle\_atom\_site\_label\_2 is missing  
Label identifying the atom site 2.

GEOM007\_ALERT\_1\_A \_geom\_angle\_atom\_site\_label\_3 is missing  
Label identifying the atom site 3.

GEOM008\_ALERT\_1\_A \_geom\_angle is missing  
Angle between atom sites 1, 2 and 3.

PLAT029\_ALERT\_3\_A \_diffrn\_measured\_fraction\_theta\_full value Low . 0.000 Why?  
PLAT043\_ALERT\_1\_A Calculated and Reported Mol. Weight Differ by .. 69.29 Check  
PLAT183\_ALERT\_1\_A Missing \_cell\_measurement\_reflns\_used Value .... Please Do !  
PLAT184\_ALERT\_1\_A Missing \_cell\_measurement\_theta\_min Value ..... Please Do !  
PLAT185\_ALERT\_1\_A Missing \_cell\_measurement\_theta\_max Value ..... Please Do !  
PLAT197\_ALERT\_1\_A Missing \_cell\_measurement\_temperature Datum .... Please Add  
PLAT198\_ALERT\_1\_A Missing \_diffrn\_ambient\_temperature Datum .... Please Add  
PLAT699\_ALERT\_1\_A Missing \_exptl\_crystal\_description Value ..... Please Do !  
PLAT880\_ALERT\_1\_A No datum for \_diffrn\_reflns\_number supplied .... Please Do !  
PLAT881\_ALERT\_1\_A No Datum for \_diffrn\_reflns\_av\_R\_equivalents ... Please Do !  
PLAT902\_ALERT\_1\_A No (Interpretable) Reflections Found in FCF .... Please Check

---

 **Alert level C**

PLAT077\_ALERT\_4\_C Unitcell Contains Non-integer Number of Atoms .. Please Check  
PLAT151\_ALERT\_1\_C No s.u. (esd) Given on Volume ..... Please Do !

---

 **Alert level G**

|                   |                                                  |                |              |
|-------------------|--------------------------------------------------|----------------|--------------|
| PLAT005_ALERT_5_G | No Embedded Refinement Details Found in the CIF  |                | Please Do !  |
| PLAT045_ALERT_1_G | Calculated and Reported Z Differ by a Factor ... |                | 0 Check      |
| PLAT104_ALERT_1_G | The Reported Crystal System is Inconsistent with |                | Fm-3m Check  |
| PLAT300_ALERT_4_G | Atom Site Occupancy of O1                        | Constrained at | 0.6667 Check |
| PLAT300_ALERT_4_G | Atom Site Occupancy of Nb1                       | Constrained at | 0.3919 Check |
| PLAT300_ALERT_4_G | Atom Site Occupancy of Li1                       | Constrained at | 0.6081 Check |
| PLAT300_ALERT_4_G | Atom Site Occupancy of D1                        | Constrained at | 0.3333 Check |
| PLAT301_ALERT_3_G | Main Residue Disorder .....                      | (Resd 1)       | 100% Note    |
| PLAT301_ALERT_3_G | Main Residue Disorder .....                      | (Resd 2)       | 100% Note    |
| PLAT301_ALERT_3_G | Main Residue Disorder .....                      | (Resd 3)       | 100% Note    |
| PLAT304_ALERT_4_G | Non-Integer Number of Atoms in .....             | (Resd 1)       | 0.01 Check   |
| PLAT304_ALERT_4_G | Non-Integer Number of Atoms in .....             | (Resd 3)       | 0.01 Check   |
| PLAT808_ALERT_5_G | No Parseable SHELXL Style Weighting Scheme Found |                | Please Check |
| PLAT882_ALERT_1_G | No Datum for _diffn_reflns_av_unetI/netI .....   |                | Please Do !  |
| PLAT883_ALERT_1_G | No Info/Value for _atom_sites_solution_primary . |                | Please Do !  |
| PLAT980_ALERT_1_G | No Anomalous Scattering Factors Found in CIF ... |                | Please Check |

---

20 **ALERT level A** = Most likely a serious problem - resolve or explain  
0 **ALERT level B** = A potentially serious problem, consider carefully  
2 **ALERT level C** = Check. Ensure it is not caused by an omission or oversight  
16 **ALERT level G** = General information/check it is not something unexpected

25 ALERT type 1 CIF construction/syntax error, inconsistent or missing data  
0 ALERT type 2 Indicator that the structure model may be wrong or deficient  
4 ALERT type 3 Indicator that the structure quality may be low  
7 ALERT type 4 Improvement, methodology, query or suggestion  
2 ALERT type 5 Informative message, check

---

It is advisable to attempt to resolve as many as possible of the alerts in all categories. Often the minor alerts point to easily fixed oversights, errors and omissions in your CIF or refinement strategy, so attention to these fine details can be worthwhile. In order to resolve some of the more serious problems it may be necessary to carry out additional measurements or structure refinements. However, the purpose of your study may justify the reported deviations and the more serious of these should normally be commented upon in the discussion or experimental section of a paper or in the "special\_details" fields of the CIF. checkCIF was carefully designed to identify outliers and unusual parameters, but every test has its limitations and alerts that are not important in a particular case may appear. Conversely, the absence of alerts does not guarantee there are no aspects of the results needing attention. It is up to the individual to critically assess their own results and, if necessary, seek expert advice.

### **Publication of your CIF in IUCr journals**

A basic structural check has been run on your CIF. These basic checks will be run on all CIFs submitted for publication in IUCr journals (*Acta Crystallographica*, *Journal of Applied Crystallography*, *Journal of Synchrotron Radiation*); however, if you intend to submit to *Acta Crystallographica Section C* or *E* or *IUCrData*, you should make sure that full publication checks are run on the final version of your CIF prior to submission.

### **Publication of your CIF in other journals**

Please refer to the *Notes for Authors* of the relevant journal for any special instructions relating to CIF submission.

Datablock VESTA\_phase\_1 - ellipsoid plot

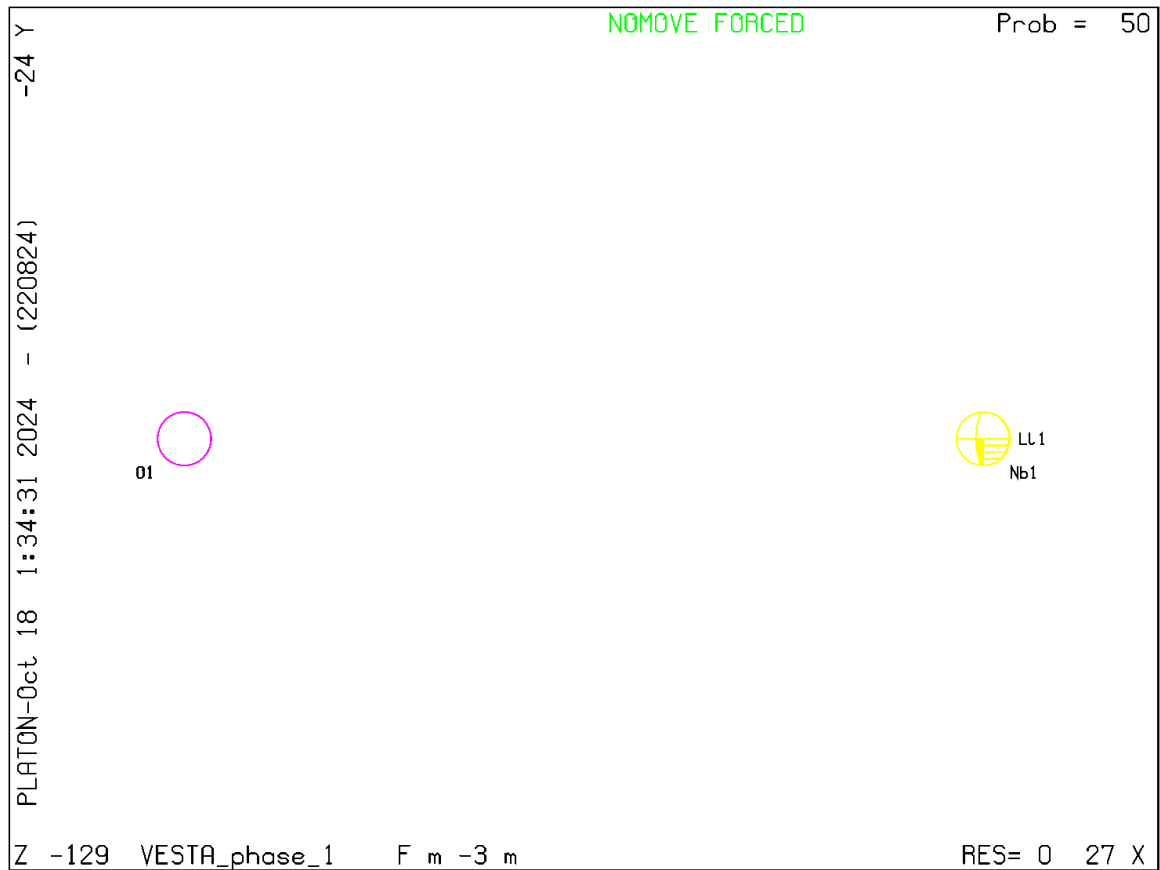

Supplement: d4cc05503a1.pdf [file d4cc05503a1.pdf]
